# Supplementary material for: Synthesis of a pyridine-based covalent organic framework as an efficient adsorbent for rhodamine B removal
Source: Royal Society of Chemistry journal article supplement (doi:10.1039/d3ra04184k), 2023-01-01
Supplement: d3ra04184k1.pdf [file d3ra04184k1.pdf]

## **[*Supporting Information*]**

### **Synthesis of pyridine-based covalent organic framework as efficient adsorbent for rhodamine B removal**

Kejian Chang,\* Huijuan Huang, Yuandong Meng, Zidan Ju, Haiyan Song, Liang  
Zhang, Xiaoqin Niu, Zhi-Jun Li\*

*College of Petrochemical Engineering, Longdong University, Qingyang, Gansu,  
745000, P. R. China.*

E-mail: *kejianchang\_chem@163.com, lizhj\_chem@163.com*

#### **Table of Contents**

#### **Section I. Materials and Instrumentation**

#### **Section II. Synthetic procedures and characterizations of TAPP- DBTA-COF and TAPP-DBTA-COP.**

#### **Section III. Adsorption experiments**

#### **Section IV. References**

## Section I. Materials and Instrumentation

All chemicals and solvents were commercially sourced and used without further purification. Deionized water was used throughout all experiments. 2,4,6-tris(4-aminophenyl)pyridine (TAPP) and 2,5-dibromobenzene-1,4-dicarbaldehyde (DBTA) were synthesized according to reported literature method.<sup>1,2</sup>

Fourier transform Infrared (FT-IR) spectra were recorded on a Shimadzu 8400S instrument. Solid-state NMR measurements were carried out on a Bruker WB Avance III 400 MHz spectrometer. Powder X-ray diffraction (PXRD) patterns were collected on an Ultima IV X-ray diffractometer with Cu K $\alpha$  radiation ( $\lambda = 0.15406$  nm) and operated at 40 kV and 40 mA. Scanning Electron Micrograph (SEM) images were obtained with a Zeiss Gemini 300 microscope operated at an accelerating voltage of 3.0 kV. Elemental analysis data was recorded on a Carlo-Erba EA-1110 instrument. The thermogravimetric analysis (TGA) were measured with a TGA5500 instrument over the temperature range of 30 to 800 °C with a heating rate of 10 °C/min under nitrogen atmosphere. The nitrogen adsorption and desorption isotherms were measured at 77 K using a Micromeritics ASAP 2460 system. The surface area was calculated from the adsorption data using Brunauer-Emmett-Teller (BET) method. UV-vis spectra were recorded on an Agilent Cary 60 Spectrophotometer. X-ray photoelectron spectroscopy (XPS) data were recorded with an ESCALAB 250Xi spectrometer (ThermoFisher Scientific).

## Section II. Synthetic procedures and characterizations of TAPP-DBTA-COF and TAPP-DBTA-COP.

### Synthesis of TAPP-DBTA-COF.

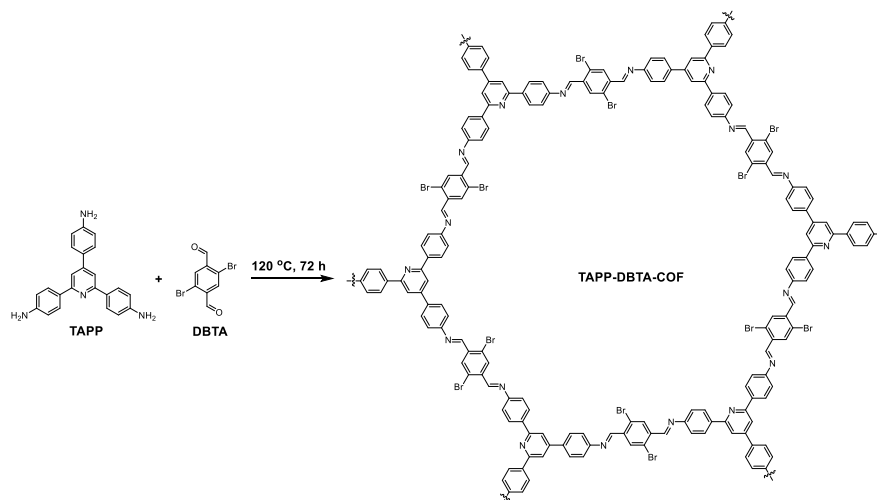

2,4,6-tris(4-aminophenyl)pyridine (188 mg, 0.5 mmol), 2,5-dibromobenzene-1,4-dicarbaldehyde (233 mg, 0.8 mmol) and 6 mL *o*-dichlorobenzene/mesitylene (4 mL/2 mL) were charged into a 20 mL vial. The resulting mixture was sonicated for 5 min and then 0.8 mL of 6 M acetic acid was added. The vial was sealed and heated at 120 °C for 72 h. The precipitate was collected by filtration and washed with dichloromethane, acetone, methanol respectively. Further purification was conducted *via* Soxhlet extraction with THF for 12 h. After being dried at 80°C for 10 h, the final **TAPP-DBTA-COF** was obtained as a yellow powder in 85% yield. **Elemental Analysis:** calcd. for C<sub>70</sub>H<sub>40</sub>N<sub>8</sub>Br<sub>6</sub>: C, 57.10; H, 2.74; N, 7.61. Found: C, 56.04; H, 2.64; N, 7.89.

### Synthesis of TAPP-DBTA-COP.

2,4,6-tris(4-aminophenyl)pyridine (106 mg, 0.30 mmol), 2,5-dibromobenzene-1,4-dicarbaldehyde (131 mg, 0.45 mmol) and 8 mL DMSO were charged into a 50 mL vial. The resulting mixture was heated at 80 °C for 24 h. After that, the precipitate was collected by filtration and washed with dichloromethane, acetone, methanol respectively. Further purification was conducted *via* Soxhlet extraction with THF for 12 h. After being dried at 80°C for 10 h, the final **TAPP-DBTA-COP** was obtained as

a pale brown powder in 83% yield. **Elemental Analysis:** calcd. for  $C_{70}H_{40}N_8Br_6$ : C, 57.10; H, 2.74; N, 7.61. Found: C, 55.72; H, 2.82; N, 7.92.

*The deviations in elemental analysis of TAPP-DBTA-COF and TAPP-DBTA-COP may be caused by trace amounts solvent trapped in porous network.*

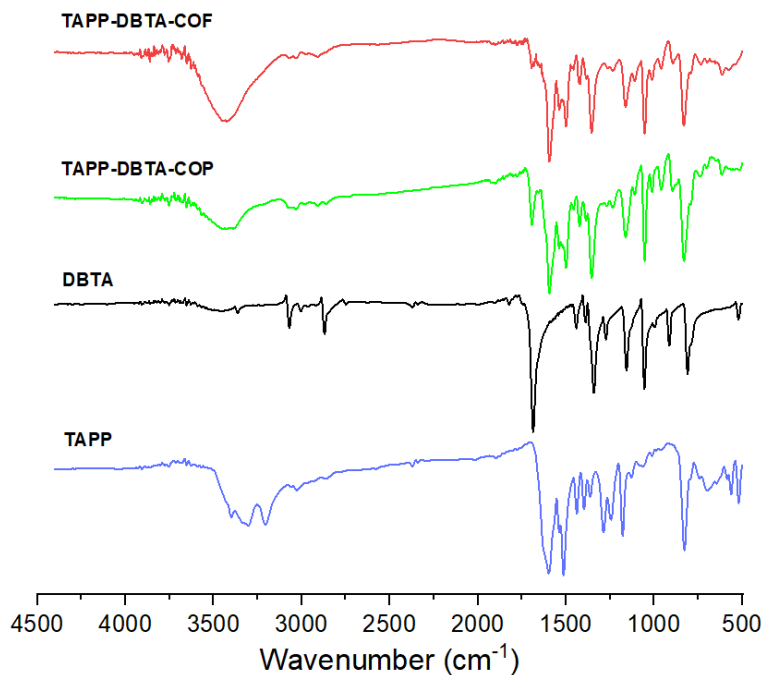

**Fig. S1.** FT-IR spectra of TAPP-DBTA-COF, TAPP-DBTA-COP and monomers.

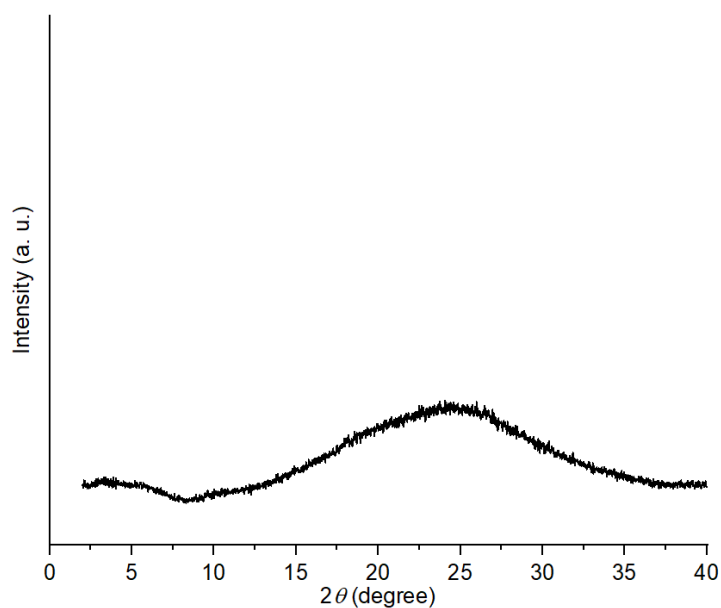

**Fig. S2.** PXRD patterns of TAPP-DBTA-COP.

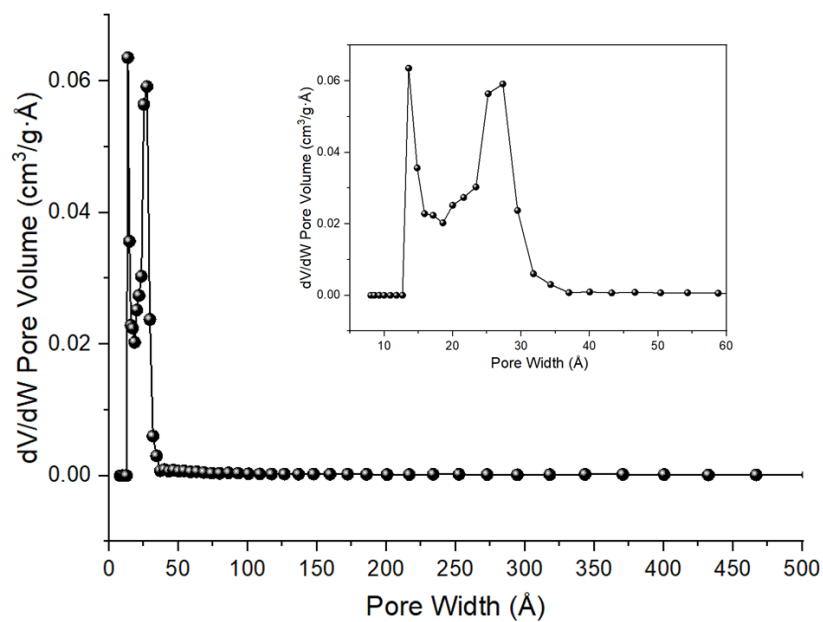

**Fig. S3.** Pore diameter of TAPP-DBTA-COF calculated from desorption isotherm with DFT method.

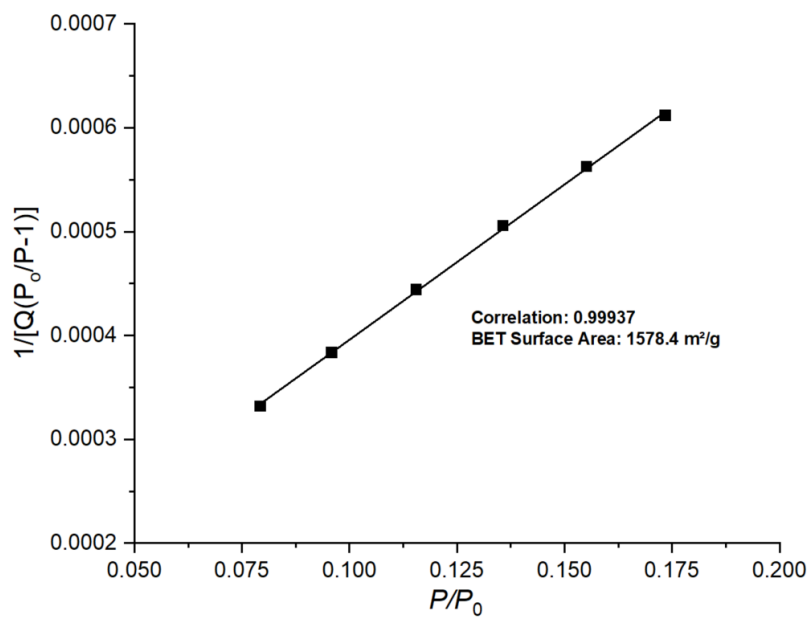

**Fig. S4.** BET surface area plot of TAPP-DBTA-COF.

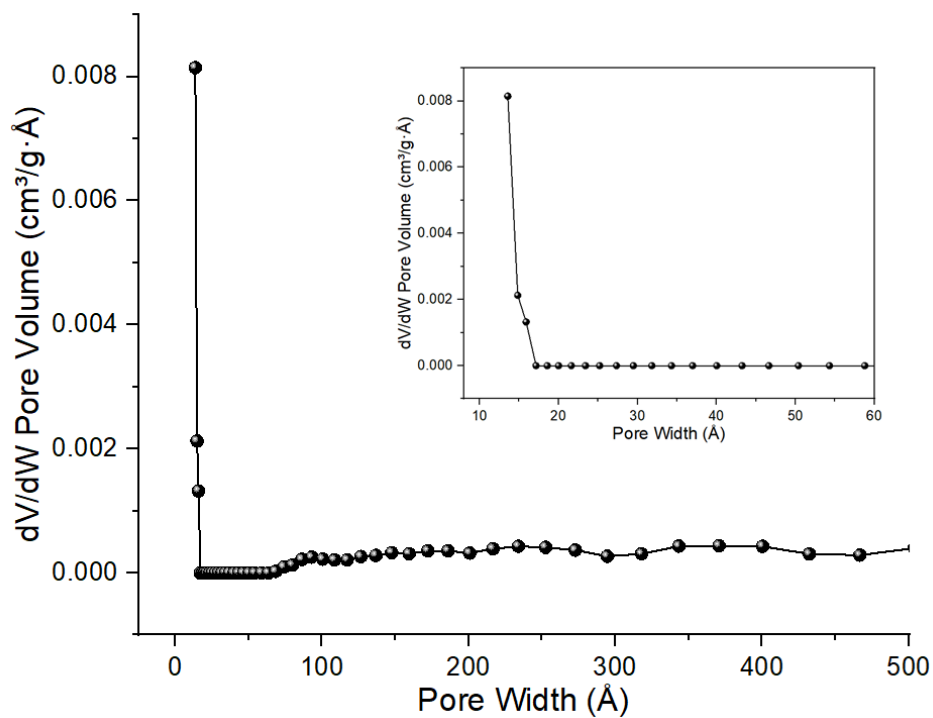

**Fig. S5.** Pore diameter of TAPP-DBTA-COP calculated from desorption isotherm with DFT method.

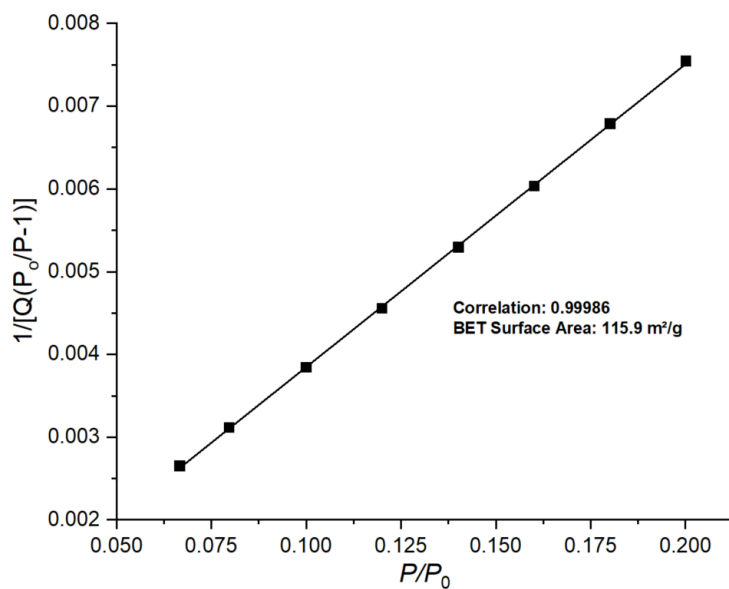

**Fig. S6.** BET surface area plot of TAPP-DBTA-COP.

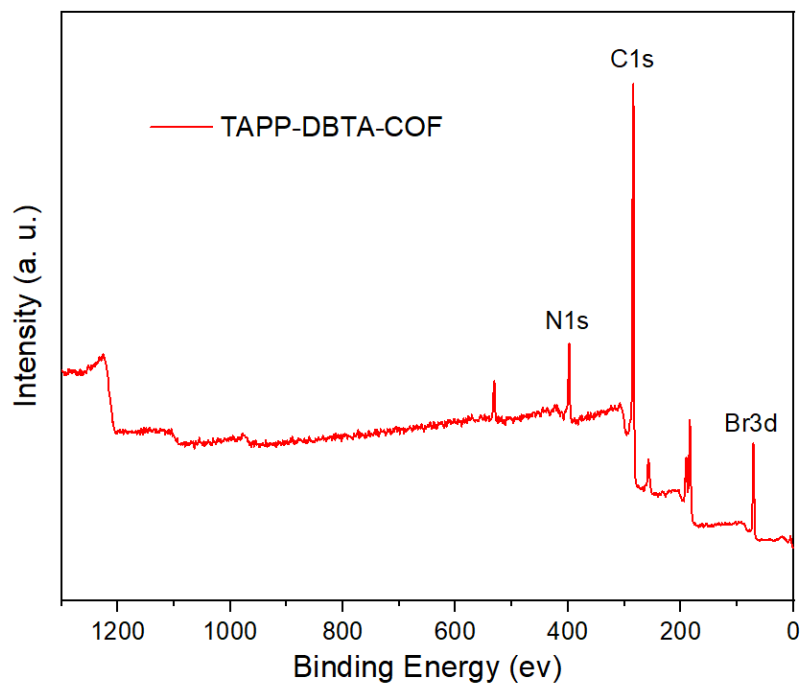

**Fig. S7.** XPS survey spectra of TAPP-DBTA-COF.

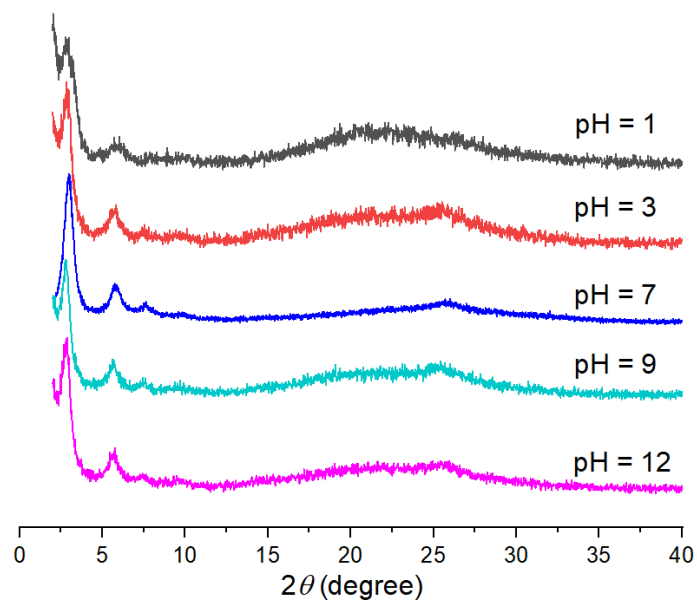

**Fig. S8.** PXRD patterns of TAPP-DBTA-COF before and after treatment with different aqueous solutions (pH = 1, 3, 7, 9, 12).

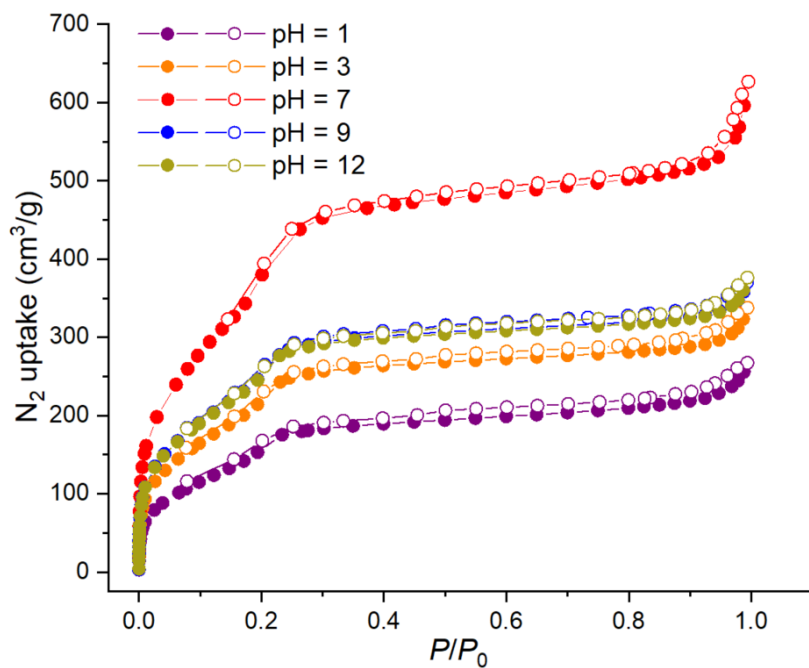

**Fig. S9.** Nitrogen sorption isotherm curves of TAPP-DBTA-COF before and after treatment with different aqueous solutions (pH = 1, 3, 7, 9, 12). The BET surface areas were 664.7, 933.5, 1578.4, 1036.3 and 1053.0  $m^2 g^{-1}$ , respectively.



**Table S1.** Fractional atomic coordinates for the unit cell of TAPP-DBTA-COF.

| Space group: <i>P2/m</i><br>$a = 38.7109 \text{ \AA}$ , $b = 3.5765 \text{ \AA}$ , $c = 35.7454 \text{ \AA}$ , $\alpha = \gamma = 90^\circ$ , $\beta = 117.4762^\circ$ |          |       |         |      |          |       |         |
|------------------------------------------------------------------------------------------------------------------------------------------------------------------------|----------|-------|---------|------|----------|-------|---------|
| Atom                                                                                                                                                                   | X (Å)    | Y (Å) | Z (Å)   | Atom | X (Å)    | Y (Å) | Z (Å)   |
| C1                                                                                                                                                                     | -0.1587  | 0     | 1.20326 | H32  | -0.04349 | 0     | 1.12984 |
| N2                                                                                                                                                                     | -0.14142 | 0     | 1.17768 | H33  | -0.08246 | 0     | 1.16675 |
| C3                                                                                                                                                                     | -0.1331  | 0     | 1.25019 | C34  | -0.03372 | 0     | 1.05747 |
| C4                                                                                                                                                                     | -0.09225 | 0     | 1.26603 | H35  | -0.01447 | 0     | 1.091   |
| C5                                                                                                                                                                     | -0.06732 | 0     | 1.30946 | C36  | -0.01634 | 0     | 1.02821 |
| C6                                                                                                                                                                     | -0.08217 | 0     | 1.3384  | C37  | 0.02443  | 0     | 1.04369 |
| C7                                                                                                                                                                     | -0.12283 | 0     | 1.32319 | C38  | 0.0404   | 0     | 1.01571 |
| C8                                                                                                                                                                     | -0.14795 | 0     | 1.27972 | Br39 | 0.05998  | 0     | 1.10271 |
| H9                                                                                                                                                                     | -0.0794  | 0     | 1.24474 | H40  | 0.07185  | 0     | 1.02869 |
| H10                                                                                                                                                                    | -0.03604 | 0     | 1.32097 | C41  | -0.22255 | 0     | 1.14008 |
| N11                                                                                                                                                                    | -0.05479 | 0     | 1.38258 | C42  | -0.19967 | 0     | 1.18448 |
| H12                                                                                                                                                                    | -0.13567 | 0     | 1.34435 | C43  | -0.26692 | 0     | 1.11951 |
| H13                                                                                                                                                                    | -0.17876 | 0     | 1.27022 | C44  | -0.28735 | 0     | 1.14387 |
| C14                                                                                                                                                                    | -0.0626  | 0     | 1.41435 | C45  | -0.3281  | 0     | 1.12478 |
| H15                                                                                                                                                                    | -0.09232 | 0     | 1.40943 | C46  | -0.35017 | 0     | 1.08105 |
| C16                                                                                                                                                                    | -0.03069 | 0     | 1.45821 | C47  | -0.33077 | 0     | 1.05616 |
| C17                                                                                                                                                                    | -0.03884 | 0     | 1.49283 | C48  | -0.29    | 0     | 1.07499 |
| C18                                                                                                                                                                    | -0.00844 | 0     | 0.534   | H49  | -0.27295 | 0     | 1.1778  |
| Br19                                                                                                                                                                   | -0.09086 | 0     | 1.48608 | H50  | -0.34291 | 0     | 1.14416 |
| H20                                                                                                                                                                    | -0.01575 | 0     | 0.55987 | N51  | -0.39193 | 0     | 1.06375 |
| C21                                                                                                                                                                    | -0.16133 | 0     | 1.13487 | H52  | -0.34659 | 0     | 1.02214 |
| C22                                                                                                                                                                    | -0.20231 | 0     | 1.11565 | H53  | -0.27767 | 0     | 1.05347 |
| C23                                                                                                                                                                    | -0.13847 | 0     | 1.11039 | C54  | -0.41753 | 0     | 1.02406 |
| C24                                                                                                                                                                    | -0.15616 | 0     | 1.06579 | H55  | -0.40858 | 0     | 0.99954 |
| C25                                                                                                                                                                    | -0.1334  | 0     | 1.04462 | C56  | -0.45974 | 0     | 1.0116  |
| C26                                                                                                                                                                    | -0.09277 | 0     | 1.06686 | C57  | -0.48769 | 0     | 0.9687  |
| C27                                                                                                                                                                    | -0.07478 | 0     | 1.11122 | C58  | 0.47261  | 0     | 0.95744 |
| C28                                                                                                                                                                    | -0.09737 | 0     | 1.13256 | Br59 | -0.47363 | 0     | 0.92389 |
| H29                                                                                                                                                                    | -0.18733 | 0     | 1.04649 | H60  | 0.45191  | 0     | 0.92417 |
| H30                                                                                                                                                                    | -0.14737 | 0     | 1.01044 | H61  | 0.21325  | 0     | 0.79548 |
| N31                                                                                                                                                                    | -0.0714  | 0     | 1.04288 | H62  | 0.21793  | 0     | 0.91793 |

### Section III. Organic dyes adsorption experiments

#### *Sorption kinetics study*

Typically, TAPP-DBTA-COF or TAPP-DBTA-COP (3 mg) was dispersed in 5 mL Rh B aqueous solution (200 ppm) and stirred under room temperature. After stirring for a desired time, the sorbent was filtered with a syringe filter (PTFE, 0.45  $\mu\text{m}$ ), and the solution was detected by UV-vis spectrophotometer. The adsorption percentage was obtained by comparing the maximum absorbance ( $\lambda = 554 \text{ nm}$ ) with the original Rh B aqueous solution.

$$Q_t = \left( \frac{C_0 - C_t}{m} \right) \times V$$

where  $Q_t$  is the adsorption capacity at contact time  $t$ ,  $C_0$  is the initial concentration of Rh B solution,  $C_t$  is the concentration of Rh B at time  $t$ ,  $m$  is the mass of TAPP-DBTA-COF or TAPP-DBTA-COP, and the  $V$  is the volume of Rh B aqueous solution.

Two kinetic models, including pseudo-first order model and pseudo-second order model were used to fit the sorption kinetics data. These two models can be expressed in the following equations:

Pseudo-first order equation:

$$Q_t = Q_e - Q_e e^{-k_1 t}$$

Pseudo-second order equation:

$$Q_t = \frac{K_2 Q_e^2 t}{1 + k_2 Q_e t}$$

where  $k_1$  and  $k_2$  ( $\text{g mg}^{-1} \text{ min}^{-1}$ ) are the rate constants of pseudo-first order and pseudo-second order, respectively.

#### *Sorption isotherm study*

The sorption isotherm experiments of TAPP-DBTA-COF and TAPP-DBTA-COP were conducted by varying the initial concentrations of Rh B (400-2200 ppm for TAPP-DBTA-COF, or 40-120 ppm for TAPP-DBTA-COP). Typically, adsorbent (5 mg) was

dispersed in 6 mL Rh B aqueous solution. The solution was stirred for 2.5 h under room temperature, and then the solution was filtered with a syringe filter (PTFE, 0.45  $\mu\text{m}$ ). After being diluted with deionized water, the solution was measured with UV-vis spectrophotometer. The equilibrium adsorption capacity ( $Q_e$ ) was calculated by using the following equation.

$$Q_e = \left( \frac{C_0 - C_e}{m} \right) \times V$$

where the  $C_e$  is the equilibrium concentration of Rh B solution.

The adsorption isotherm curves of Rh B were fitted by LangmuirEXT1, Langmuir, and Freundlich models respectively.

LangmuirEXT1 equation:

$$Q_e = \frac{Q_m K_S C_e^\gamma}{1 + K_S C_e^\gamma}$$

Langmuir equation:

$$Q_e = \frac{Q_m K_L C_e}{1 + K_L C_e}$$

Freundlich equation:

$$Q_e = K_F C_e^{1/n}$$

where  $Q_m$  is the maximum adsorption capacity,  $K_S$  and  $\gamma$  are the constants of LangmuirEXT1 model,  $K_L$  is the constant of Langmuir model,  $K_F$  and  $n$  are constants of Freundlich model.

The influence of pH value of the solution was studied by dispersing TAPP-DBTA-COF (5 mg) in 6 mL Rh B aqueous solution (1400 ppm) with different pH values (pH = 1, 3, 7, 9, 12). The pH values of the solution were adjusted *via* adding 0.1 M HCl or 0.1 M NaOH. After stirring for 2 hours, the sorbent was filtered with a syringe filter (PTFE, 0.45  $\mu\text{m}$ ), and the solutions were detected by UV-vis spectrophotometer, the adsorption percentage was determined based on the intensity reduction of the

characteristic peak of Rh B.

The recyclability of TAPP-DBTA-COF was studied in an amplified experiment. 28 mg of TAPP-DBTA-COF was dispersed in 40 mL Rh B aqueous solution (1400 ppm), and stirred for adsorption. The adsorbed Rh B can be desorbed *via* directly eluting with ethanol until the eluent was changed to colorless. The ethanol solution was collected and detected by UV-vis spectrophotometer to determine desorption efficiency. After thoroughly washing with ethanol, the regenerated adsorbent TAPP-DBTA-COF-Regenerated was obtained and dried at 80 °C. The next adsorption cycle was performed under the same conditions.

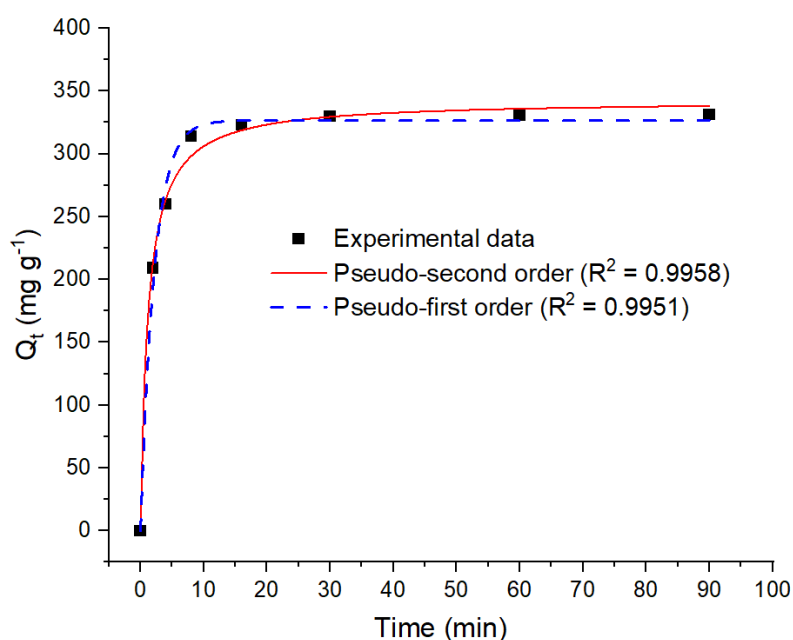

| Fitting model       | Parameter                                                                             | correlation coefficient |
|---------------------|---------------------------------------------------------------------------------------|-------------------------|
| Pseudo-first order  | $Q_e = 326.6 \text{ mg g}^{-1}$<br>$k_1 = 0.460 \text{ min}^{-1}$                     | $R^2 = 0.9951$          |
| Pseudo-second order | $Q_e = 342.7 \text{ mg g}^{-1}$<br>$k_2 = 0.00244 \text{ g mg}^{-1} \text{ min}^{-1}$ | $R^2 = 0.9958$          |

**Fig. S10.** The kinetics for adsorption of Rh B by TAPP-DBTA-COF fitted by pseudo-first and pseudo-second order models respectively.

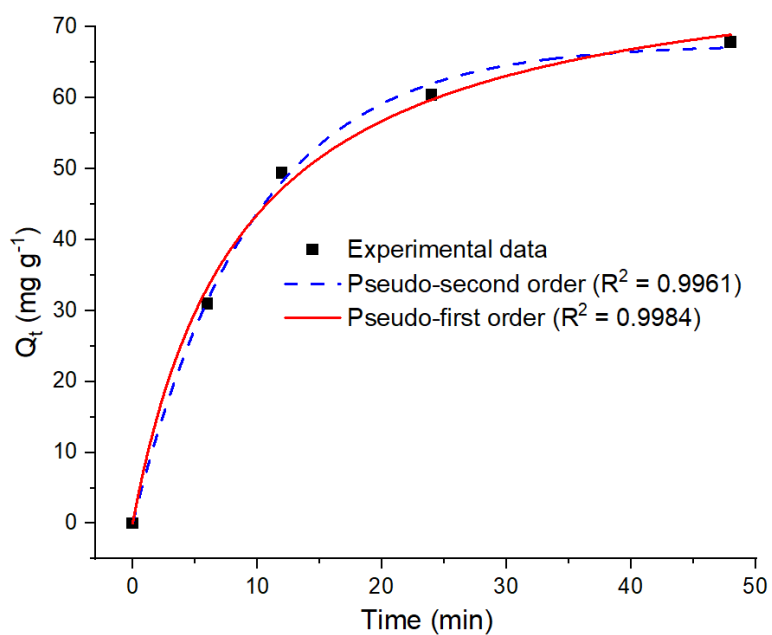

| Fitting model       | Parameter                                                                            | correlation coefficient |
|---------------------|--------------------------------------------------------------------------------------|-------------------------|
| Pseudo-first order  | $Q_e = 67.5 \text{ mg g}^{-1}$<br>$k_1 = 0.104 \text{ min}^{-1}$                     | $R^2 = 0.9984$          |
| Pseudo-second order | $Q_e = 81.4 \text{ mg g}^{-1}$<br>$k_2 = 0.00141 \text{ g mg}^{-1} \text{ min}^{-1}$ | $R^2 = 0.9961$          |

**Fig. S11.** The kinetics for adsorption of Rh B by TAPP-DBTA-COP fitted by pseudo-first and pseudo-second order models respectively.

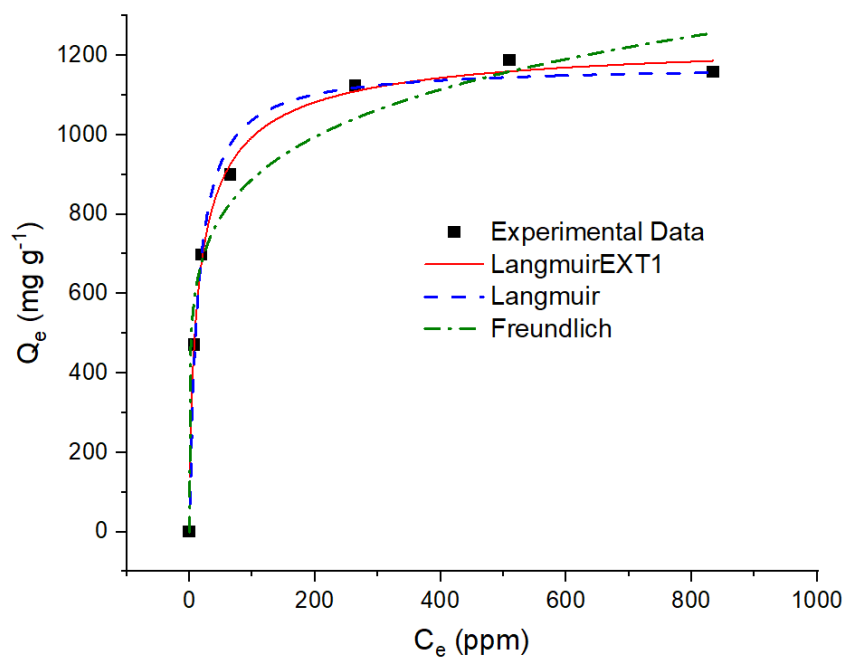

| Fitting model | Parameter                                                           | correlation coefficient |
|---------------|---------------------------------------------------------------------|-------------------------|
| LangmuirEXT1  | $Q_m = 1254.1 \text{ mg g}^{-1}$<br>$K_s = 0.14$<br>$\gamma = 0.72$ | $R^2 = 0.9924$          |
| Langmuir      | $Q_m = 1174.6 \text{ mg g}^{-1}$<br>$K_L = 0.08$                    | $R^2 = 0.9919$          |
| Freundlich    | $K_F = 418.6$<br>$n = 6.12$                                         | $R^2 = 0.9689$          |

**Fig. S12.** The adsorption isotherm of Rh B by TAPP-DBTA-COF fitted with three different models. As listed above, LangmuirEXT1 model displayed a better correlation coefficient than other two models, suggesting LangmuirEXT1 model can well describe the adsorption process.

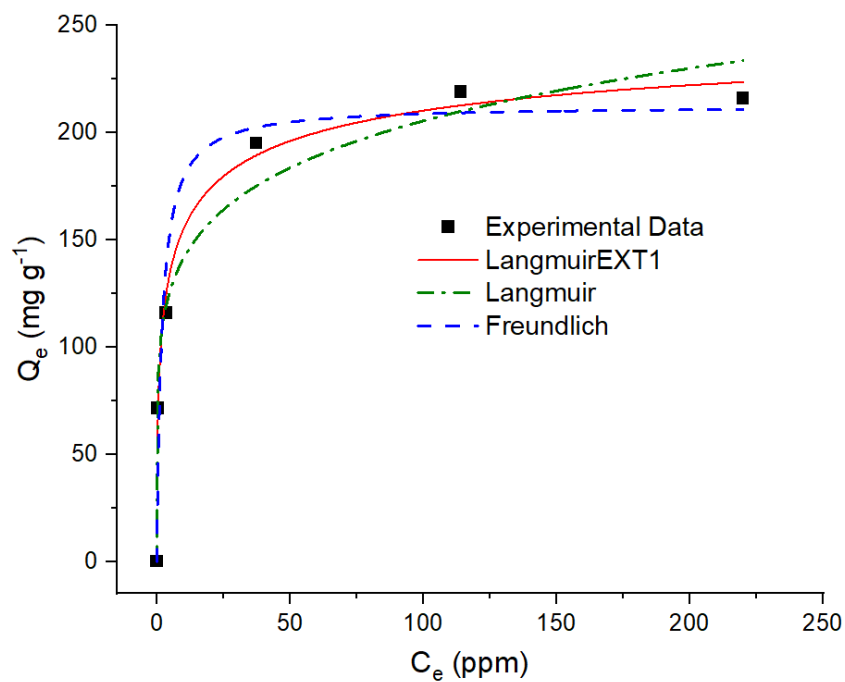

| Fitting model | Parameter                                                          | correlation coefficient |
|---------------|--------------------------------------------------------------------|-------------------------|
| LangmuirEXT1  | $Q_m = 263.7 \text{ mg g}^{-1}$<br>$K_s = 0.52$<br>$\gamma = 0.44$ | $R^2 = 0.9871$          |
| Langmuir      | $Q_m = 212.7 \text{ mg g}^{-1}$<br>$K_L = 0.53$                    | $R^2 = 0.9514$          |
| Freundlich    | $K_F = 97.22$<br>$n = 6.15$                                        | $R^2 = 0.9765$          |

**Fig. S13.** The adsorption isotherm of Rh B by TAPP-DBTA-COP fitted with three different models. As listed above, LangmuirEXT1 model displayed a better correlation coefficient than other two models, suggesting LangmuirEXT1 model can well describe the adsorption process.

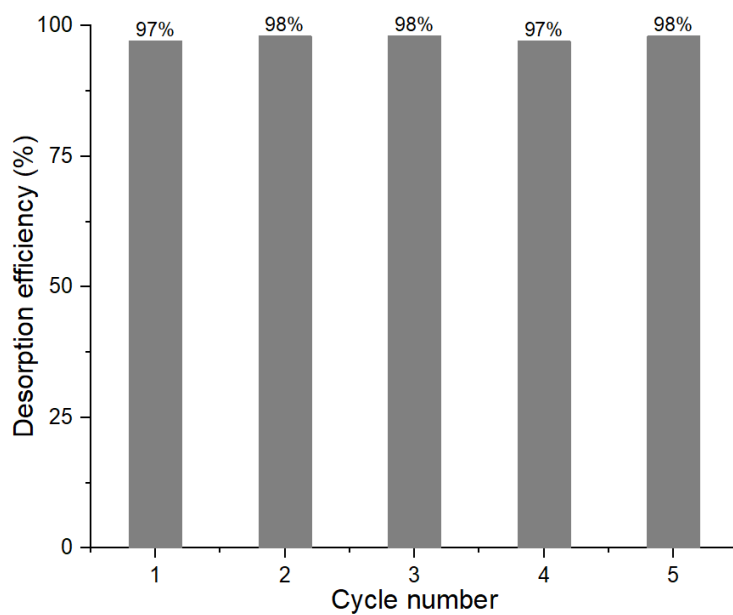

**Fig. S14.** Desorption efficiency of Rh B on TAPP-DBTA-COF with ethanol after each cycle.

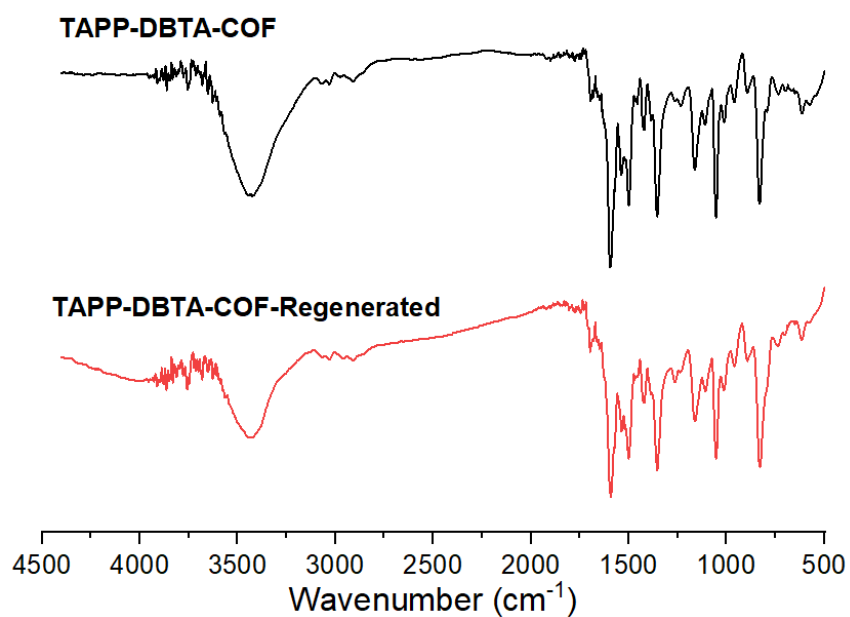

**Fig. S15.** FT-IR spectra of TAPP-DBTA-COF and TAPP-DBTA-COF-Regenerated.



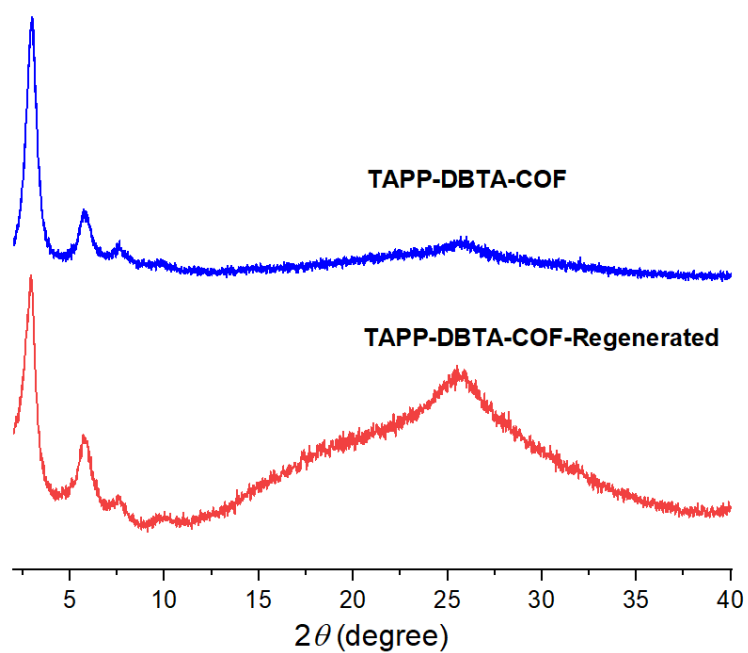

**Fig. S16.** PXRD patterns of TAPP-DBTA-COF and TAPP-DBTA-COF-Regenerated.

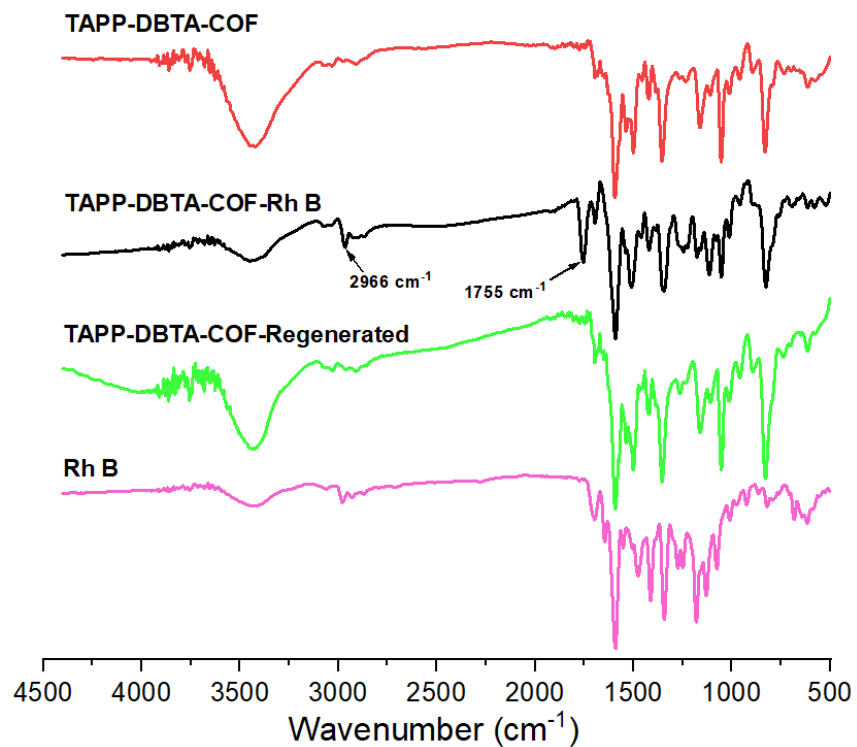

**Fig. S17.** FT-IR spectra of TAPP-DBTA-COF, TAPP-DBTA-COF-Rh B, TAPP-DBTA-COF-Regenerated and Rh B.

## Section IV. References

- (1) Shen, D.; Liu, J.; Yang, H.; Yang, S. Highly Thermally Resistant and Flexible Polyimide Aerogels Containing Rigid-rod Biphenyl, Benzimidazole, and Triphenylpyridine Moieties: Synthesis and Characterization. *Chem. Lett.* **2013**, *42*, 1545-1547.
- (2) Deng, Y.; Zhang, Z.; Du, P. Y.; Ning, X. M.; Wang, Y.; Zhang, D. X.; Liu, J.; Zhang, S. T.; Lu, X. Q. Embedding Ultrasmall Au Clusters into the Pores of a Covalent Organic Framework for Enhanced Photostability and Photocatalytic Performance. *Angew. Chem., Int. Ed.* **2020**, *59*, 6082-6089.
